1 **Genomic divergence, introduction history and latitudinal adaptation of grass carp**

2 Le Wang <sup>\*,†,§</sup>, Yubang Shen <sup>\*,†,§</sup>, Jianjun Fu<sup>‡</sup>, Xiaoyan Xu<sup>\*</sup>, Gen Hua Yue <sup>†,††,‡‡</sup> and Jiale Li <sup>\*</sup>

3 <sup>\*</sup> Key Laboratory of Exploration and Utilization of Aquatic Genetic Resources, Ministry of  
4 Education, Shanghai Ocean University, Shanghai 201306, China

5 <sup>†</sup> Molecular Population Genetics Group, Temasek Life Sciences Laboratory, 1 Research Link,  
6 National University of Singapore, Singapore, 117604, Republic of Singapore

7 <sup>‡</sup> Key Laboratory of Freshwater Fisheries and Germplasm Resources Utilization, Ministry of  
8 Agriculture, Freshwater Fisheries Research Center, Chinese Academy of Fishery Sciences,  
9 Wuxi 214081

10 <sup>††</sup> Department of Biological Sciences, National University of Singapore, 14 Science Drive 4,  
11 Singapore 117543, Republic of Singapore

12 <sup>‡‡</sup> School of Biological Sciences, Nanyang Technological University, 60 Nanyang Drive,  
13 Singapore 637551, Republic of Singapore

14 <sup>§</sup> Le Wang and Yubang Shen contributed equally to this study

15

16 NGS data was deposited in the DDBJ Sequence Read Archive (Project accession no.  
17 PRJDB4785).

18

19

20

21

22 **Keywords:** grass carp, genomic divergence, introduction, local selection, latitudinal variation

23 **Running title:** population genomics of grass carp

24

25 Corresponding authors

26 Dr. Gen Hua Yue

27 Temasek Life Sciences Laboratory, 1 Research Link, National University of Singapore,

28 117604 Singapore

29 Tel: +65-68727405; Fax: +65-68727007; Email: genhua@tll.org.sg

30 Dr. Jiale Li

31 Key Laboratory of Exploration and Utilization of Aquatic Genetic Resources, Ministry of

32 Education, Shanghai Ocean University, Shanghai 201306, China

33 Tel: +86 021 61900566; FAX: +86 021 61900405; E-mail: jlli2009@126.com

34

35

36

37

38

39

40

41 **Abstract**

42 Understanding the genomic signatures of population differentiation is fundamental to obtain a  
43 comprehensive view of the evolutionary process of organisms. Grass carp is one of the most  
44 important fish species in the world due to its significant value in aquaculture and world-wide  
45 vegetation biocontrol. However, little is known about the contemporary population structure  
46 and also the genetic basis of adaptation to a wide range of latitudinal environments. Using  
47 43310 SNPs generated by genotyping by sequencing in 197 grass carps from nine  
48 populations, we examined the patterns of population differentiation, historical introduction  
49 and evidence of local selection. The overall genetic differentiation across all native  
50 populations was unexpectedly low. Nevertheless, these native populations were clearly  
51 differentiated into three genetic clusters, corresponding to the Yangtze River, the Pearl River  
52 and the Heilongjiang River System, respectively. Populations in Malaysia, India and Nepal,  
53 with the earliest introduction records, most likely have an origin from the Pearl River System.  
54 Using conceptually different approaches, 451 loci were detected under potential local  
55 selection, among which 84 were annotated to have a gene feature. 19.0% of the genes under  
56 putative selection were involved in immune responses, while 42.9% of the annotated loci  
57 showed a signature of latitudinal variation. This study provides valuable information for  
58 application of genomic tools in addressing questions concerning population differentiation  
59 that was influenced by both neutral and adaptive forces, as well as human activities.

60 **Introduction**

61 Grass carp (*Ctenopharyngodon idella*), belonging to the family Cyprinidae, is a large  
62 herbivorous freshwater fish species (Froese and Pauly 2015). It is of great importance as a  
63 food fish species as well as a species for world-wide aquatic vegetation control (Cross 1969;  
64 Lembi *et al.* 1978). Grass carp is native to eastern Asia and broadly distributed from the

65 Heilongjiang River System (Amur River) southward to northern Vietnam (Froese and Pauly  
66 2015). According to literature records, grass carp has a culture history of more than 1300  
67 years since the Tang Dynasty (FAO 2014). The aquaculture practices are mainly conducted  
68 within the geographical regions of the Yangtze and the Pearl River Systems of China (FAO  
69 2014). Recent success in artificial breeding has significantly promoted the aquaculture  
70 industry of this species (Stanley 1976; Boney *et al.* 1984; Allen Jr and Wattendorf 1987;  
71 Peter *et al.* 1988). The annual global production has been over 5 million tons since 2013 with  
72 an estimated economic value of 5 billion US dollar (FAO 2014). Grass carp is of the highest  
73 production yield among all the farmed fish species around the world and accounts for  
74 approximately 15.6% of global freshwater aquaculture production (FAO 2014).

75 Due to herbivorous habits, grass carp has been broadly introduced to more than 40 countries  
76 around the world to control the undesirable and/or invasive aquatic plants of freshwater  
77 systems (Skelton 2001). Artificial introductions were intensively conducted since the 1960s  
78 (Welcomme 1988). The earliest introduction of grass carp was documented from Southern  
79 China to Malaysia by Chinese immigrants in the 1800s (Welcomme 1988). However, which  
80 native populations these introduced grass carp originated from is unclear. Recently, many  
81 studies have reported that introduced/invasive grass carp have endangered native ecological  
82 systems and caused great economic loss because they can completely eliminate vegetation  
83 from freshwater systems, destroy the populations of native fish species and introduce  
84 parasites (Moyle 1986; Chilton II and Muoneke 1992; Bain 1993).

85 Within its native distribution range, grass carp mainly lives in three independent river  
86 systems: the Heilongjiang River, the Yangtze River and the Pearl River System (Fu *et al.*  
87 2013). Understanding range-wide population structure is critical to conserve and utilize the  
88 genetic resources (Awise 1992). However, it is still not clear, due to a lack of genetic studies  
89 (Zhang *et al.* 2001; Liu *et al.* 2009; Fu *et al.* 2013). In particular, grass carp has been cultured

90 for more than 1300 years (FAO 2014). It is also not known if aquaculture practices with such  
91 long history have left significant imprints on the contemporary population structure.  
92 Importantly, a geographical pattern of population differentiation is the genetic basis to trace  
93 the introduction from native habitats to foreign environments (Cornuet *et al.* 1999; Paetkau *et*  
94 *al.* 2004). Investigation on the environments of both native and foreign habitats can provide  
95 critical biological information for setting up effective introduction plans (Lande 1988; Bain  
96 1993). It can also mitigate the adverse effects on the foreign habitats that were caused by  
97 grass carp as an agent of biological invasion (Cross 1969; Bain 1993).

98 Local selection is of critical importance in the evolution of species (Savolainen *et al.* 2013).  
99 Genetic studies focusing on different environments can provide crucial information for  
100 understanding the selective forces driving local adaptation (Sultan and Spencer 2002). In  
101 some cases, however, local selection acts along certain geographical gradients, e.g. latitude,  
102 longitude and altitude, and shows the same direction as the overall neutral forces (Storz 2002;  
103 Vasemägi 2006). Thus, it is more challenging to discriminate adaptive evolutionary forces  
104 from background neutral forces (McKay and Latta 2002; Storz 2002). Nevertheless, these  
105 environmental factors are of great interest in studying the selective forces that shape adaptive  
106 divergence (Gilchrist and Partridge 1999; Alberto *et al.* 2013). Significant associations  
107 between environmental variables and genetic markers are typically investigated and  
108 considered as footprints of local selection (Sezgin *et al.* 2004; Vasemägi 2006; Antoniazza *et*  
109 *al.* 2010). Although adaptive variation can be consistent with “isolation-by-distance” in  
110 geographical pattern and also explained by neutral forces like gene flow, genetic drift and  
111 admixture between adjacent populations, the footprints of local selection still can be inferred  
112 by comparing the relative pattern and strength of population differentiation against  
113 environmental variables between candidate loci of adaptive divergence and neutral markers  
114 (Storz 2002; McKown *et al.* 2014).

115 Grass carp are naturally distributed in a wide range from Southern Siberia to northern  
116 Vietnam spanning approximately 30 latitudinal degrees and is tolerant of extreme  
117 temperature from 0° to 38°C (Froese and Pauly 2015). The distribution is much likely limited  
118 by habitat temperature, and even correlated to the latitudinal variation of temperature. Due to  
119 the small number of markers, e.g. microsatellites, however, previous studies only focused on  
120 identifying the neutral genetic variations and population structure (Zhang *et al.* 2001; Liu *et*  
121 *al.* 2009; Fu *et al.* 2013). The lack of useful high-density genetic markers limited our  
122 understanding on adaptive population differentiation, particularly along latitude (Narum *et al.*  
123 2013).

124 Here, a total of 197 grass carp, including both wild populations throughout the whole  
125 distribution range and populations with the earliest introduction history were analyzed using  
126 ddRAD-Seq approach (Peterson *et al.* 2012). First, the aim was to identify range-wide  
127 population structure and examine the pattern of gene flow, which can help understand the  
128 geographic and demographic factors that have played crucial roles in population  
129 differentiation of grass carp. Furthermore, we intended to test if the level of population  
130 differentiation is sufficient to trace the introduction of grass carp by using the populations  
131 with the earliest introduction history. The results can provide useful information for tracing  
132 global introduction of grass carp and better utilizing this species in the biocontrol of aquatic  
133 vegetation. In addition, as the native populations show a significant latitudinal distribution  
134 pattern, our goal was to detect the footprints of local selection and discuss if such divergence  
135 was correlated to specific environmental factors, particularly temperature. Finally, we aimed  
136 to identify candidate genes under potential directional selection, which help understand the  
137 mechanism of evolution under selection. In total, this study can disentangle the effects of  
138 demographic history, gene flow and local selection on the contemporary population  
139 differentiation and provide important information for both utilizing this species as a tool in

140 biocontrol and understanding the adaptive divergence of freshwater fish species in the  
141 presence of complicated gene flow and demographic history.

## 142 **Materials and Methods**

### 143 **Sampling and data collection**

144 Grass carp including six wild and three introduced populations consisting of 197 individuals  
145 were collected between 2007 and 2008. The wild populations were from the three river  
146 systems: the Heilongjiang River, the Yangtze River and the Pearl River System, across this  
147 species' distribution range, while the three introduced populations were sampled from  
148 Malaysia, India and Nepal, respectively (**Table 1 & Figure 1**). The annual average  
149 temperature of each sampling site was retrieved from [weather.sina.com.cn](http://weather.sina.com.cn) (**Table 1**).  
150 Population Malaysia was documented as being introduced in the 1800s from southern China,  
151 while population India was recorded as being introduced from Hong Kong, China (the Pearl  
152 River System), in 1959 and 1968 (Welcomme 1988). Population Nepal was set up by  
153 introduction from India in 1966-1967 (Shireman and Smith 1983). All samples were  
154 estimated as more than one year old. Fin tissue was collected and preserved in 95% ethanol at  
155 -20°C. Genomic DNA was isolated using DNeasy Blood & Tissue Kit (Qiagen, Germany)  
156 and quantified using Qubit® assays (Life Technologies, USA).

### 157 **Genotyping by sequencing**

158 Genotyping by sequencing (GBS) was conducted using the ddRAD-Seq approach (Peterson  
159 *et al.* 2012). Restriction enzymes PstI-HF and MspI (New England Biolabs, USA) were  
160 selected for library construction. 200 ng genomic DNA was fully digested with two enzymes.  
161 Digested fragments were ligated with barcoded adaptors using T4 ligase (New England  
162 Biolabs, USA) and then pooled for cleanup with QIAquick PCR Purification Kit (Qiagen,

163 Germany). The cleaned products were size selected and purified (300-500 bp) by running  
164 gels and using QIAquick Gel Extraction Kit (Qiagen, Germany), respectively. The recovered  
165 libraries were then amplified using Phusion® High-Fidelity DNA Polymerase (New England  
166 Biolabs, USA). After a final cleanup using QIAquick PCR Purification Kit (Qiagen,  
167 Germany), the libraries were sent to a NextSeq 500 platform (Illumina, USA) for 2x150 bp  
168 paired-end sequencing.

169 The program *process\_radtags* (Catchen *et al.* 2011) was employed to filter the raw  
170 sequencing reads with default parameters and reads with any uncalled base were removed.  
171 Clean reads were then demultiplexed and trimmed to 100 bp for *in silico* mapping. First,  
172 reads were mapped to the reference genome of grass carp v1.0 (Wang *et al.* 2015b) using the  
173 program BWA-MEM with default parameters (Li and Durbin 2010). Reads with multiple  
174 targets in the reference were excluded from further analysis. Reference-aligned reads were  
175 then assembled into stacks for each individual using *pstacks* implemented in the package  
176 Stacks v1.34 (Catchen *et al.* 2011). A total of 54 individuals randomly selected from each  
177 population were used to construct a catalogue of stacks using *cstacks*. Stacks from each  
178 individual were then matched against the catalogue for SNP discovery using *sstacks*. Finally,  
179 genotyping was conducted across all populations using the program *populations* with a  
180 minimum of 10× sequence depth. SNPs were further filtered to meet the following criteria:  
181 present in > 70% of the individuals in each population, have no more than two alleles and  
182 show an observed heterozygosity of < 0.5 (Hohenlohe *et al.* 2010). Only one SNP was  
183 retained for each RAD locus. Hardy-Weinberg equilibrium (HWE) for each locus was  
184 examined using Genepop v4.2 (Raymond and Rousset 1995) and loci that deviated from  
185 HWE in a single population at the significance level of 0.01 were excluded from further  
186 analysis.

## 187 **Population structure and phylogenetic relationship**



188 Genetic diversity for each population was measured by observed heterozygosity ( $H_O$ ),  
189 expected heterozygosity ( $H_E$ ) and nucleotide diversity ( $\Pi$ ), while genetic divergence for each  
190 individual locus was estimated using *F-statistics* (Weir and Cockerham 1984). All these  
191 calculations were performed using the program *populations* (Catchen *et al.* 2011). Population  
192 genetic divergence was estimated in the form of pairwise  $F_{ST}$  using the program Arlequin 3.5  
193 (Excoffier and Lischer 2010). Statistical significance was examined using an exact test with  
194 10 000 permutations. Population structure at both the population and individual levels was  
195 investigated by principle component analysis using the program Eigenstrat v5.1 (Price *et al.*  
196 2006). The pattern of population differentiation was examined in the form of isolation-by-  
197 distance (IBD) using Mantel tests with the program IBD v1.52 (Bohonak 2002). The genetic  
198 distance was measured using  $F_{ST}/1-F_{ST}$ , while the geographical distance was estimated as the  
199 linear distance between sampling localities.

200 The phylogenetic relationship among populations was constructed using a Neighbor-Joining  
201 approach with the program Populations v1.2.33 (Langella 1999) by bootstrapping over loci  
202 for 1000 times. The origins of introduced populations from native populations were  
203 determined using ancestral alleles. The software fastStructure v1.0 (Raj *et al.* 2014) was  
204 employed to infer the ancestral alleles between one introduced population and two native  
205 populations. The two selected native populations were from the Yangtze River and the Pearl  
206 River systems, respectively, and had the closest phylogenetic relationship with the introduced  
207 population. The program was run 10 times for each K value (from 1 to 6) with default  
208 parameters. The most likely number of genetic clusters (K) was estimated by plotting the  
209 marginal likelihood value.

## 210 **Identifying footprints of selection**

211 In order to identify evidence of latitudinal variation at SNP loci, we independently estimated  
212 the association between allele frequencies for each SNP and latitude at the population level  
213 using a liner correlation method. Pairwise genetic distance based on allele frequencies of  
214 individual locus was estimated according to the method by Reynolds *et al.* (1983). Genetic  
215 distance was then correlated to geographical distance among populations using Mantel tests  
216 to discriminate neutral mutations from the loci showing latitudinal variation in allele  
217 frequencies. By removing the loci under putative neutral processes, a set of candidate SNPs  
218 showing latitudinal variation but not isolation-by-distance in genetic divergence was obtained.

219 Evidence of local adaptation was detected for individual locus using a Bayesian generalized  
220 linear mixed model involving covariance of allele frequencies and environmental variables  
221 with the program Bayenv (Coop *et al.* 2010). A Bayes factor (BF) was calculated for each  
222 SNP to measure the strength of the correlation between SNP variation and environmental  
223 variables. According to the method by Coop *et al.* (2010), a  $BF > 3$  was considered as a  
224 substantial evidence for selection. The program was run for five times with an independent  
225 variance-covariance matrix of population genetic variation to achieve consistency among the  
226 runs.

227  $F_{ST}$ -based outlier tests were also performed to identify signatures of spatial purifying  
228 selection. Outlier loci under directional selection are expected to show higher levels of  
229 divergence, while loci under balancing selection would show lower levels of genetic  
230 divergence compared to the putative neutral loci (Beaumont and Nichols 1996; Foll and  
231 Gaggiotti 2008). Firstly, a Bayesian simulation-based test implemented in BayeScan (Foll  
232 and Gaggiotti 2008) was used to identify outlier SNPs. Loci with Bayes factor  $> 3$  were  
233 considered as substantial outliers. Considering that grass carp are distributed in different river  
234 systems and that there is among-group genetic structure, a hierarchical island model  
235 (Beaumont and Nichols 1996) for identifying outlier loci was also employed using the

236 program Arlequin 3.5 (Excoffier and Lischer 2010) with the following parameters: 50 000  
237 simulations, 10 simulated groups, and 100 demes per group. Only outliers above the 99%  
238 quantile of the null distribution were considered as candidates under spatial purifying  
239 selection.

#### 240 **Analysis of the genes under putative selection**

241 Loci under putative directional selection were functionally annotated by Blast2Go (Conesa *et*  
242 *al.* 2005) against all available nucleotide databases with an E-value cutoff of  $10^{-6}$ . SNPs  
243 within both exons and introns were considered to have a gene feature. Enrichment of Gene  
244 Ontology (GO) terms was conducted using the program WEGO (Ye *et al.* 2006) with default  
245 parameters. Loci were also mapped to the reference genome of zebrafish (GRCz10) using  
246 Blastx to retrieve the corresponding Ensembl gene IDs. A more detailed functional  
247 annotation of these genes were then performed by mapping to the Kyoto Encyclopedia of  
248 Genes and Genomes (KEGG) pathway database (Kanehisa and Goto 2000) using the program  
249 David (Huang *et al.* 2009). The signaling pathways of at least two genes in default were  
250 enriched for further analysis.

### 251 **Results**

#### 252 **SNP discovery and genotyping**

253 In total, NGS produced an average of 10.17 million raw reads for each individual. After  
254 quality control, 9.21 million reads per individual were obtained for sequence mapping and  
255 SNP discovery. A total of 280544 SNPs were discovered across all nine populations. After  
256 removing the loci that failed to meet the filtering criteria, 43310 SNPs were genotyped across  
257 all populations, among which 35844 (82.8%) showed minor allele frequency (MAF) of >  
258 0.05.

## 259 Genetic diversity and population structure

260 The measures of genetic diversity, including  $H_O$ ,  $H_E$  and  $\Pi$ , estimated based on all variant  
261 SNPs were shown in **Table 1**. For the six wild populations, Vietnam showed slightly lower  
262 genetic diversity than the others. We also observed that the genetic diversity of the introduced  
263 populations including Malaysia, India and Nepal were significantly lower than that of the  
264 wild populations ( $P < 0.001$ , one-way ANOVA test).

265 Pairwise  $F_{ST}$  analysis revealed significant genetic differentiation between the wild  
266 populations and the introduced populations with  $F_{ST}$  ranging from 0.1126 between Zhaoqing  
267 and India to 0.2399 between Vietnam and Malaysia (**Table 2**). However, genetic  
268 differentiation between each pair of wild populations was shallow with  $F_{ST}$  ranging from  
269 0.0073 between Jiujiang and Shishou to 0.0515 between Hanjiang and Vietnam, although  
270 significantly different from 0. The wild population Zhaoqing from the Pearl River System  
271 showed slightly lower genetic differentiation with the three introduced populations: Malaysia,  
272 India and Nepal, compared to the other wild populations ( $P < 0.05$ , paired *t-test*). For wild  
273 populations, genetic divergence at individual locus was estimated between the most divergent  
274 populations (Hanjiang vs Vietnam) and also between the most distant populations (Nenjiang  
275 vs Vietnam). We observed that no loci showed  $F_{ST} > 0.5$  and only  $< 15\%$  of loci had  $F_{ST} >$   
276 0.1 for both population pairs (**Figure 2**). Loci showing  $F_{ST} > 0.1$  were found more frequently  
277 between Nenjiang and Vietnam (14.5%) than between Hanjiang and Vietnam (5.6%).  
278 Principle component analysis revealed that the wild populations were strikingly differentiated  
279 from the introduced populations (**Figure 3a**). For the wild populations, Zhaoqing and  
280 Vietnam from the Pearl River System were clearly differentiated from the populations from  
281 both the Yangtze River System (Hanjiang, Jiujiang and Shishou) and the Heilongjiang River  
282 System (Nenjiang), although there was some mixture of individuals between the Yangtze  
283 River and the Heilongjiang River Systems (**Figure 3b**). The pattern of genetic differentiation

284 across all wild populations rejected the model of isolation-by-distance ( $R^2 = 0.187$ ,  $P = 0.16$ ;  
285 **Figure 4a**). Considering that some individuals of the Heilongjiang River System very likely  
286 have an origin from the Yangtze River System (**Figure 3b**), the population Nenjiang was  
287 further removed from Mantel tests. Interestingly, we identified a strong correlation between  
288 population differentiation and geographical distance ( $R^2 = 0.876$ ,  $P < 0.001$ ; **Figure 4b**).

### 289 **Population introduction history**

290 The phylogenetic tree showed that native populations from the Yangtze River (Hanjiang,  
291 Jiujiang and Shishou), the Heilongjiang River (Nenjiang) and the Pearl River (Zhaoqing and  
292 Vietnam) Systems formed three independent clusters, respectively, with the Heilongjiang  
293 River System cluster located between the Yangtze River System and the Pearl River System  
294 clusters (**Figure 5a**). For the introduced populations, India and Nepal formed one subcluster  
295 and joined into the Pearl River System cluster. Although joined into the Pearl River System,  
296 the introduced population Malaysia showed a relatively long genetic distance with the other  
297 populations within this cluster and was relatively close to the Heilongjiang River System.  
298 Considering the results of the principle component analysis, population Nenjiang and  
299 Malaysia might have an origin of admixture between the Yangtze River and the Pearl River  
300 System lineages (**Figure 5a**). We further inferred the origin of the two populations separately  
301 using ancestral alleles with the program fastStructure. Two populations of the closest genetic  
302 relationship, Jiujiang and Zhaoqing from the Yangtze River and the Pearl River System,  
303 respectively, were selected as the potential ancestral populations. Considering most of the  
304 SNPs have a very low level of genetic divergence (**Figure 2**), only loci of  $F_{ST} > 0.05$ ,  
305 numbering 5986, were used for these analyses. The most likely K values for estimation of the  
306 origins of the populations Nenjiang and Malaysia were inferred as 2 and 3, respectively  
307 (**online supporting Figure S1**). We found that many more ancestral alleles in the Nenjiang  
308 population in the Heilongjiang River System originated from the Yangtze River System than

309 from the Pearl River System (**Figure 5b**). However, for the introduced population Malaysia,  
310 only ancestral alleles from the Pearl River System (Zhaoqing) were observed (**Figure 5c**).

### 311 **Identifying loci under putative selection**

312 Among all the SNPs with  $MAF > 0.05$ , 5197 (14.4%) were found to have significant linear  
313 regression ( $P < 0.05$ ) between latitudinal gradients and allele frequencies. Mantel tests  
314 revealed that 3351 (9.4%) SNPs showed significant patterns of isolation-by-distance ( $R^2 >$   
315  $0.514$ ,  $P < 0.05$ ) for individual locus. As stated above, the Nenjiang population showed a  
316 signature of admixture, and this produced decisive effects on the pattern of isolation-by-  
317 distance (**Figure 3 & Figure 4**). Therefore, we further removed this population from Mantel  
318 tests. Using five native populations, 3710 (10.4%) SNPs were observed to have significant  
319 patterns of isolation-by-distance ( $R^2 > 0.632$ ,  $P < 0.05$ ). After removing loci with any  
320 evidence of isolation-by-distance, a total of 2700 loci that showed significant latitudinal  
321 variation in allele frequencies were obtained for further analysis (**Figure 6**).

322 The Bayesian generalized linear mixed model identified 768 SNPs that showed significant  
323 association between genetic variations and latitudinal gradients across all six populations at  
324 individual locus ( $BF > 3$ ). In  $F_{ST}$  based outlier tests, BayeScan detected 263 SNPs as  
325 substantial outliers ( $BF > 3$ ), while the hierarchical island model identified 744 SNPs as  
326 significant outliers at the significance level of 0.99. A total of 791 (2.2%) unique loci were  
327 revealed to be outliers by the two  $F_{ST}$  based tests.

328 Within the 2700 loci that showed correlation to latitudinal gradients, 132 were candidates  
329 under directional selection as revealed by the program Bayenv and both  $F_{ST}$  based outlier  
330 tests (**Figure 6**). Moreover, Bayenv and the outlier tests identified 265 and 285 unique  
331 candidates under spatially purifying selection, respectively (**Figure 6**). We observed that the  
332 loci under putative selection revealed by the two outlier tests and Bayenv had much higher

333 genetic divergence with mean  $F_{ST}$  values of 0.198 and 0.104, respectively. However, the loci  
334 correlated to latitudinal gradients showed a much lower mean  $F_{ST}$  (0.034) than the loci with  
335 the pattern of IBD ( $F_{ST}$ , 0.065) and also the whole dataset ( $F_{ST}$ , 0.037) (**Figure 7**). Low  
336 genetic divergence much likely suggests that selection pressure is weak on these loci. In order  
337 to reduce false positives, only loci that were revealed to be under potentially directional  
338 selection by outlier tests, Bayenv or allele frequencies association study, and also showed  $F_{ST}$   
339 of more than the 95% quantile (0.121) of the whole dataset, were retained, which produced  
340 451 loci for further analyses.

### 341 **Functional annotation of genes under putative selection**

342 Among the 451 loci, 84 (18.6%) were annotated as having a gene feature and were further  
343 investigated (**Table S1**). 42.9% (36) of the annotated genes were indicated to be significantly  
344 associated with latitudinal gradients as revealed by Bayenv or allele frequency correlation  
345 study. GO enrichment revealed that these genes covered a wide range of functions in  
346 biological processes: biological regulation, cellular process, developmental process, immune  
347 system process, metabolic process, pigmentation and response to stimulus (**online**  
348 **supporting Figure S2**). Three KEGG pathways: Focal adhesion, Vascular smooth muscle  
349 contraction and the Toll-like receptor signaling pathway, were enriched with each containing  
350 two genes (**Table S2**). Interestingly, by searching for literature, we found 16 (19.0%) genes  
351 that play important roles in immune responses (e.g. MHC I UAK and MHC II DAB) and/or  
352 antiviral responses (e.g. Myxovirus resistance proteins and Mitochondrial antiviral signalling  
353 protein) (**Table 3**). Among these immune-related genes, 8 (50.0%) showed a pattern of  
354 latitudinal variation as revealed by Bayenv or allele frequency correlation study, while the  
355 other 8 genes were suggested to be under spatially purifying selection (**Table 3**).

### 356 **Discussion**

357 In this study, we investigated range-wide population structure of native populations and  
358 origin of introduced populations in the South and Southeast Asia, as well as latitudinal  
359 variation and local selection of grass carp using population genomic approaches. This study  
360 provides important implications for future application of grass carp in the biocontrol of  
361 aquatic vegetation and understanding the mechanism of local adaptation, particularly  
362 adaptive latitudinal variation for freshwater fish species with a wide range of geographical  
363 distribution.

#### 364 **High gene flow among native populations**

365 Typically, freshwater fishes are more isolated by various geographical factors than marine  
366 fishes and thus have a lower level of gene flow (Ward *et al.* 1994). In this study, we observed  
367 that pairwise population genetic differentiation was very low ( $F_{ST}$ , 0.0073-0.0515),  
368 comparable to a previous study using microsatellites (Liu *et al.* 2009). This level of gene flow  
369 across the native populations of grass carp is much higher than the average for freshwater  
370 species (Gyllensten 1985; Ward *et al.* 1994; Cooke *et al.* 2012) and even higher than some  
371 fishes living in the open marine environment, e.g. the Chinook salmon (*Oncorhynchus*  
372 *tshawytscha*) (Larson *et al.* 2014), Atlantic salmon (*Salmo salar*) (Bourret *et al.* 2013) and  
373 Asian seabass (*Lates calcarifer*) (Wang *et al.* 2015a). Further investigation on genetic  
374 differentiation at individual locus revealed that only < 15 % of total loci showed  $F_{ST} > 0.1$   
375 and no loci had  $F_{ST} > 0.5$ . Considering the geographical isolation among the three river  
376 systems, such results are rather unexpected. The genetic distance between the Pearl River  
377 System (Vietnam) and the Yangtze River System (Hanjiang) was closer than between the  
378 Pearl River System (Vietnam) and the Heilongjiang River System (Nenjiang), although the  
379 latter showed a rather longer geographical distance. Nevertheless, we observed that the  
380 number of loci with  $F_{ST} > 0.1$  was much more between Nenjiang and Vietnam than between  
381 Hanjiang and Vietnam. Considering the long aquaculture history of more than 1300 years,



382 these contradicting results strongly suggest that the high gene flow among the three river  
383 systems is not only naturally occurring but also induced by human activities. Interestingly,  
384 the observed pattern of population differentiation did not conform to isolation-by-distance  
385 across the whole data set. However, after removal of the Nenjiang population that was  
386 suggested to have an admixture origin between the Yangtze River and the Pearl River  
387 Systems, the remaining populations showed a strong signal of isolation-by-distance. This  
388 indicates that although human-induced gene flow might have played important roles in  
389 shaping the overall population structure of grass carp, it only showed overwhelming  
390 importance in the Heilongjiang River System.

391 According to historical records, grass carp was abundant in both the Yangtze River System  
392 and the Pearl River System, and was widely captured from the wild as seeds for aquaculture  
393 locally (FAO 2014). There was no practical need to introduce grass carp between the two  
394 river systems. On the other hand, it is reasonable that gene flow can be high between the two  
395 river systems because they partially overlap in geography (Zhu 1993). For these reasons, the  
396 migration occurred much more naturally and thus the population differentiation showed a  
397 strong pattern of isolation-by-distance. However, we cannot exclude the possibility that  
398 human activities played important roles in dispersal of grass carp. Such gene flow might be  
399 merely induced so randomly with no directional purpose that it has much less effects on  
400 shaping genetic structure than the natural gene flow.

401 In contrast to the Yangtze and the Pearl River systems, the distribution and culture of grass  
402 carp in the Heilongjiang River System have never been abundant nor considered as a major  
403 aquaculture practice according to both historical records and current official fishery statistics  
404 (FAO 2014; Liu and Li 2015). Geographically, the Heilongjiang River System is completely  
405 isolated with the other two river systems. On the other hand, the Nenjiang population was  
406 mixed with alleles originating from both the Yangtze River and the Pearl River Systems as

407 inferred from fastStructure. Hence, the low genetic differentiation between this river system  
408 and the other river systems strongly indicates that human-induced dispersal played more  
409 important roles than natural introgression. In fact, grass carp in the Heilongjiang River  
410 System grow slower than in the other river systems due to low water temperature (Cui *et al.*  
411 1995). Therefore, seeds from the other river systems, particularly from the Yangtze River  
412 system, were commonly introduced for aquaculture purposes because of geographical  
413 adjacency. This is the most likely explanation for the low genetic differentiation of grass carp  
414 between the Heilongjiang River System and the other river systems.

#### 415 **Origins of the early introduced populations**

416 Both in terms of genetic diversity and differentiation, we observed significant genetic  
417 heterogeneity between all of the native populations and the introduced populations including  
418 Malaysia, India and Nepal, suggesting significant founder effects in the introduction of these  
419 populations (Barton and Charlesworth 1984). It is likely that the introduction of grass carp  
420 was not initiated under planned programs or that not all the introduced fish can adapt to the  
421 new habitats. Genetic differentiation among the native populations is the basis to trace the  
422 origins of the introduced populations (Cornuet *et al.* 1999; Paetkau *et al.* 2004). As expected,  
423 we identified significant genetic differentiation and also a clear geographical pattern of  
424 population differentiation among the three river systems in a background of high gene flow.  
425 Native populations from the Heilongjiang River, the Yangtze River and the Pear River  
426 Systems were separately clustered into independent genetic lineages, although there was  
427 evidence of population admixture for the Heilongjiang River System. These results provided  
428 critical clues to trace back population origins. Both pairwise  $F_{ST}$  and phylogenetic analyses  
429 indicated that all three introduced populations, Malaysia, India and Nepal originated from the  
430 Pearl River System, which was also supported by the data inferred from ancestral alleles.

431 First, the Pearl River System is geographically more adjacent to Malaysia, India and Nepal  
432 than the Yangtze River and the Heilongjiang River Systems. Therefore, it is reasonable that  
433 the Pearl River System was preferred as the source for introduction to these countries. In  
434 contrast, the Yangtze River and the Heilongjiang River Systems are not only distant from  
435 Southeast and the South Asia, but also isolated by various continental barriers, e.g. the  
436 Himalaya Mountains. It is a great challenge to introduce fish from these two river systems to  
437 Southeast and the South Asia. Most importantly, it was recorded that grass carp was first  
438 introduced into Malaysia from Southern China with the large-scale migration of Chinese  
439 people in the 1800s, although it is not clear which river system the Malaysia population  
440 originated from (Welcomme 1988). The introduction history could be inferred from the  
441 routes of Chinese migration during that time. As revealed by history studies, most of the  
442 Chinese people in Southeast Asia were from Guangdong and Fujian provinces (Pan 1999),  
443 which geographically overlap with the Pearl River System. Thus, the Malaysia population  
444 very likely has an origin in the Pearl River System, consistent with the results of the genetic  
445 data.

446 In total, our data suggest that the native populations might have accumulated enough genetic  
447 divergence for population origin assignment of the recently introduced populations of grass  
448 carp, e.g. the populations introduced to Europe, North America and also some Southern  
449 Hemisphere countries (Mitchell 1986). These results are very valuable for studying the  
450 production and physiological adaptation, as well as the living environments and habitat  
451 preferences, of both native and introduced populations. Such information can be referenced to  
452 construct comprehensive introduction plans in the future.

453 **Local selection and latitudinal variation**

454 It is a great challenge to discriminate local selection from neutral processes for organisms that  
455 have experienced complicated demographic history. Neutral processes can generate the same  
456 marks on genomic architecture as local selection does (Storz 2002; Vasemägi 2006;  
457 Savolainen *et al.* 2011; Wang *et al.* 2013; McKown *et al.* 2014; Hornoy *et al.* 2015). In some  
458 cases, adaptive traits show a specific distribution pattern along specific environmental factors.  
459 If the estimates of neutral forces are coincidentally varying along the same environmental  
460 factors, the difficulty of disentangling the roles of adaptive driving forces would be greatly  
461 enhanced (Merilä and Crnokrak 2001; McKay and Latta 2002; Storz 2002). Under this  
462 condition, a single association test between an individual locus and an environmental factor is  
463 obviously not enough to determine if one locus has experienced spatially divergent selection,  
464 particularly in the background of genome-wide patterns of isolation-by-distance (Vasemägi  
465 2006). Grass carp is such a species, which has a significant signature of latitudinal  
466 distribution. Thus, the adaptive traits might vary in parallel with the pattern of neutral  
467 processes along specific geographical gradients, like latitude. These evolutionary processes  
468 limited the potential to identify the molecular mechanism underlying adaptive evolution  
469 (McKay and Latta 2002; Chen *et al.* 2012). Here, we used conceptually different approaches  
470 to differentiate the footprints of local selection from the currents of neutral evolutionary  
471 processes (Hansen *et al.* 2010; Wang *et al.* 2013).

472 Our main purpose was to identify individual loci of higher genetic divergence than can be  
473 explained by random genetic drift and gene flow (Storz 2002). As discussed above, grass carp  
474 from different river systems very likely have unique demographic history. Grass carp  
475 originated from the Yangtze River System and expanded into the Pearl River and the  
476 Heilongjiang River Systems during the Pleistocene and Pliocene, respectively (Li and Fang  
477 1990). Nevertheless, the contemporary population structure was significantly shaped by high  
478 levels of gene flow due to both natural and artificial factors. As the Pearl River System and

479 the Heilongjiang River System cover the southernmost and the northernmost distribution  
480 ranges, respectively, such contrasting environments have likely posed strong selective  
481 pressure on the distribution of grass carp (Gardner and Latta 2006). Gene flow within the  
482 Pearl River and the Yangtze River Systems might be seldom influenced by human activities,  
483 as population differentiation still shows a significant pattern of isolation-by-distance.  
484 However, gene flow between the Heilongjiang River System and the other two river systems  
485 were profoundly influenced by recent human activities, which overall changed the  
486 geographical pattern of population differentiation such that the pattern of isolation-by-  
487 distance was no longer observed. Although influenced by human activities, the extreme  
488 northernmost environmental condition of the Heilongjiang River System can pose strong  
489 selective pressure on the introduced grass carp. Such a process of natural selection provides  
490 important clues to discriminate footprints of natural selection from genome-wide patterns of  
491 isolation-by-distance.

492 Consistent with the overall neutral evolutionary process, a large number of loci, 6489 (18.1%)  
493 of the total loci, were indicated to show a pattern of isolation-by-distance in genetic  
494 divergence. Although 14.4% (5197) were revealed to have significant correlations between  
495 latitudinal gradients and allele frequencies, some of them would be false positives because  
496 these loci also showed significant correlations between pairwise geographical distance and  
497 genetic divergence. In total, these results suggest a strong background of isolation-by-  
498 distance in the overall population differentiation of grass carp. After removing the loci which  
499 were potential false positives by application of a series of conceptually different approaches,  
500 only 451 loci were suggested to be under putative directional selection, accounting for 1.3%  
501 of the total loci. This ratio is much less than in previous studies (2.3%-10%) using fish  
502 species that showed weak or non-significant genome-wide patterns of isolation-by-distance,  
503 like Atlantic salmon (Bourret *et al.* 2013), Chinook salmon (Larson *et al.* 2014) and

504 yellowfin tuna (*Thunnus albacares*) (Grewe *et al.* 2015). Such results likely suggest that it is  
505 much less efficient to identify loci under putative directional selection with a genome-wide  
506 pattern of isolation-by-distance (Beaumont and Nichols 1996). Among the loci under putative  
507 directional selection, 18.6% were revealed to be associated with functional genes.  
508 Interestingly, 42.9% (36) of the annotated genes were indicated to be significantly correlated  
509 to latitudinal gradients, indicating clinally adaptive divergence at these loci (Storz 2002;  
510 Vasemägi 2006; Chen *et al.* 2012). Although these genes are involved in various functions,  
511 we observed a significant cluster of genes (16, 19.0%) playing important roles in immune  
512 responses (e.g. MHC I UAK and MHC II DAB) (Benacerraf 1981) and/or antiviral responses  
513 (e.g. Myxovirus resistance proteins and Mitochondrial antiviral signalling protein) (Seth *et al.*  
514 2005; Gao *et al.* 2011). Among these immune-related genes, 8 (50.0%) showed a pattern of  
515 latitudinal adaptive variation. This result further suggests that the distribution of grass carp  
516 spanning approximately 30 latitudinal degrees was also the consequence of clinal adaptation  
517 along latitude. In the case of grass carp, the annual average temperature was observed to be  
518 highly correlated to the latitude of the sampling sites ( $R^2 = 0.992$ ,  $P < 0.001$ ). However, we  
519 did not find any evidence that the enriched genes were associated to thermal adaptation. This  
520 result might suggest that the latitudinal adaptive distribution of grass carp was not directly  
521 selected by the temperature. Because the enriched genes were observed to have functions in  
522 defense against various pathogens and the diversity of pathogens were strongly related to the  
523 environmental temperature (Cashdan 2001; Mitchell *et al.* 2005; Dionne *et al.* 2007), our  
524 results might suggest that the latitudinal adaptation or clinal adaption of grass carp along  
525 latitude was the consequence of selection by pathogens and indirectly by temperature of the  
526 habitats.

527 In total, the joint application of different approaches identified a promising set of loci that  
528 were under putative directional selection. Many of them have a pattern of latitudinal

529 variations. The latitudinal distribution of grass carp likely has an adaptive genetic basis,  
530 although the underlying causes remain to be elucidated. Nevertheless, spatially purifying  
531 selection has played important roles in shaping the contemporary population structure of  
532 grass carp. Our data shed light on the genetic basis of local adaptation of grass carp with a  
533 large distribution range.

#### 534 **Acknowledgements**

535 We thank Mr. Narayan Prasad Pandit and Mr. Dang Hai Nguyen for sample collection from  
536 Vietnam, Indian and Nepal respectively. This research is supported by the National Key  
537 Technology R&D Program of China (2012BAD26B02) and the China Agriculture Research  
538 System (CARS-46-04) foundations.

#### 539 **Authors' contributions**

540 YS, LW, JL and GHY conceived the study and finalized the manuscript. YS and LW  
541 designed the experiments. YS, JF and XX carried out the lab experiments. LW and YS  
542 performed bioinformatics, analysed the molecular data and drafted the manuscript. All  
543 authors have read and approved the final manuscript.

#### 544 **References**

- 545 Alberto, F. J., J. Derory, C. Boury, J.-M. Frigerio, N. E. Zimmermann *et al.*, 2013 Imprints of  
546 natural selection along environmental gradients in phenology-related genes of  
547 *Quercus petraea*. *Genetics* 195: 495-512.
- 548 Allen Jr, S. K., and R. J. Wattendorf, 1987 Triploid grass carp: status and management  
549 implications. *Fisheries* 12: 20-24.

- 550 Antoniazza, S., R. Burri, L. Fumagalli, J. Goudet and A. Roulin, 2010 Local adaptation  
551 maintains clinal variation in melanin-based coloration of European barn owls (*Tyto*  
552 *alba*). *Evolution* 64: 1944-1954.
- 553 Avise, J. C., 1992 Molecular population structure and the biogeographic history of a regional  
554 fauna: a case history with lessons for conservation biology. *Oikos* 63: 62-76.
- 555 Bain, M. B., 1993 Assessing impacts of introduced aquatic species: grass carp in large  
556 systems. *Environmental Management* 17: 211-224.
- 557 Barton, N. H., and B. Charlesworth, 1984 Genetic revolutions, founder effects, and speciation.  
558 *Annual Review of Ecology and Systematics* 15: 133-164.
- 559 Beaumont, M. A., and R. A. Nichols, 1996 Evaluating loci for use in the genetic analysis of  
560 population structure. *Proceedings of the Royal Society of London B: Biological*  
561 *Sciences* 263: 1619-1626.
- 562 Benacerraf, B., 1981 Role of MHC gene products in immune regulation. *Science* 212: 1229-  
563 1238.
- 564 Bohonak, A., 2002 IBD (isolation by distance): a program for analyses of isolation by  
565 distance. *Journal of Heredity* 93: 153-154.
- 566 Boney, S. E., W. L. Shelton, S.-L. Yang and L. Wilken, 1984 Sex reversal and breeding of  
567 grass carp. *Transactions of the American Fisheries Society* 113: 348-353.
- 568 Bourret, V., M. P. Kent, C. R. Primmer, A. Vasemägi, S. Karlsson *et al.*, 2013 SNP-array  
569 reveals genome-wide patterns of geographical and potential adaptive divergence  
570 across the natural range of Atlantic salmon (*Salmo salar*). *Molecular Ecology* 22:  
571 532-551.
- 572 Cashdan, E., 2001 Ethnic diversity and its environmental determinants: Effects of climate,  
573 pathogens, and habitat diversity. *American Anthropologist* 103: 968-991.



- 574 Catchen, J. M., A. Amores, P. Hohenlohe, W. Cresko and J. H. Postlethwait, 2011 Stacks:  
575 building and genotyping loci de novo from short-read sequences. *G3: Genes,*  
576 *Genomes, Genetics* 1: 171-182.
- 577 Chen, J., T. Källman, X. Ma, N. Gyllenstrand, G. Zaina *et al.*, 2012 Disentangling the roles of  
578 history and local selection in shaping clinal variation of allele frequencies and gene  
579 expression in Norway spruce (*Picea abies*). *Genetics* 191: 865-881.
- 580 Chilton II, E. W., and M. I. Muoneke, 1992 Biology and management of grass carp  
581 (*Ctenopharyngodon idella*, Cyprinidae) for vegetation control: a North American  
582 perspective. *Reviews in Fish Biology and Fisheries* 2: 283-320.
- 583 Conesa, A., S. Götz, J. M. García-Gómez, J. Terol, M. Talón *et al.*, 2005 Blast2GO: a  
584 universal tool for annotation, visualization and analysis in functional genomics  
585 research. *Bioinformatics* 21: 3674-3676.
- 586 Cooke, G. M., N. L. Chao and L. B. Beheregaray, 2012 Divergent natural selection with gene  
587 flow along major environmental gradients in Amazonia: insights from genome scans,  
588 population genetics and phylogeography of the characin fish *Triportheus albus*.  
589 *Molecular Ecology* 21: 2410-2427.
- 590 Coop, G., D. Witonsky, A. Di Rienzo and J. K. Pritchard, 2010 Using environmental  
591 correlations to identify loci underlying local adaptation. *Genetics* 185: 1411-1423.
- 592 Cornuet, J.-M., S. Piry, G. Luikart, A. Estoup and M. Solignac, 1999 New methods  
593 employing multilocus genotypes to select or exclude populations as origins of  
594 individuals. *Genetics* 153: 1989-2000.
- 595 Cross, D., 1969 Aquatic weed control using grass carp. *Journal of Fish Biology* 1: 27-30.
- 596 Cui, Y., S. Chen and S. Wang, 1995 Effect of temperature on the energy budget of the grass  
597 carp, *Ctenopharyngodon idellus*. *Oceanologia et Limnologia Sinica* 26: 169-174.

- 598 Dionne, M., K. M. Miller, J. J. Dodson, F. Caron and L. Bernatchez, 2007 Clinal variation in  
599 MHC diversity with temperature: evidence for the role of host–pathogen interaction  
600 on local adaptation in Atlantic salmon. *Evolution* 61: 2154-2164.
- 601 Excoffier, L., and H. E. Lischer, 2010 Arlequin suite ver 3.5: a new series of programs to  
602 perform population genetics analyses under Linux and Windows. *Molecular Ecology*  
603 *Resources* 10: 564-567.
- 604 FAO, 2014 Cultured Aquatic Species Information Programme *Ctenopharyngodon idellus*,  
605 Rome, [www.fao.org/fishery/culturedspecies/Ctenopharyngodon\\_idellus](http://www.fao.org/fishery/culturedspecies/Ctenopharyngodon_idellus), (accessed  
606 10/2015).
- 607 Foll, M., and O. Gaggiotti, 2008 A genome-scan method to identify selected loci appropriate  
608 for both dominant and codominant markers: a Bayesian perspective. *Genetics* 180:  
609 977-993.
- 610 Froese, R., and D. Pauly, 2015 FishBase. World Wide Web electronic publication,  
611 [www.fishbase.org](http://www.fishbase.org), (accessed 10/2015).
- 612 Fu, J., J. Li, Y. Shen, R. Wang, Y. Xuan *et al.*, 2013 Genetic variation analysis of wild  
613 populations of grass carp (*Ctenopharyngodon idella*) using microsatellite markers.  
614 *Hereditas* 35: 192-201.
- 615 Gao, S., A. von der Malsburg, A. Dick, K. Faelber, G. F. Schröder *et al.*, 2011 Structure of  
616 myxovirus resistance protein a reveals intra-and intermolecular domain interactions  
617 required for the antiviral function. *Immunity* 35: 514-525.
- 618 Gardner, K. M., and R. G. Latta, 2006 Identifying loci under selection across contrasting  
619 environments in *Avena barbata* using quantitative trait locus mapping. *Molecular*  
620 *Ecology* 15: 1321-1333.

- 621 Gilchrist, A. S., and L. Partridge, 1999 A comparison of the genetic basis of wing size  
622 divergence in three parallel body size clines of *Drosophila melanogaster*. *Genetics*  
623 153: 1775-1787.
- 624 Grewe, P., P. Feutry, P. Hill, R. Gunasekera, K. Schaefer *et al.*, 2015 Evidence of discrete  
625 yellowfin tuna (*Thunnus albacares*) populations demands rethink of management for  
626 this globally important resource. *Scientific Reports* 5: 16916.
- 627 Gyllensten, U., 1985 The genetic structure of fish: differences in the intraspecific distribution  
628 of biochemical genetic variation between marine, anadromous, and freshwater species.  
629 *Journal of Fish Biology* 26: 691-699.
- 630 Hansen, M. M., K. Meier and K. L. D. Mensberg, 2010 Identifying footprints of selection in  
631 stocked brown trout populations: a spatio-temporal approach. *Molecular Ecology* 19:  
632 1787-1800.
- 633 Hohenlohe, P. A., S. Bassham, P. D. Etter, N. Stiffler, E. A. Johnson *et al.*, 2010 Population  
634 genomics of parallel adaptation in threespine stickleback using sequenced RAD tags.  
635 *PLoS Genetics* 6: e1000862.
- 636 Hornoy, B., N. Pavy, S. Gérardi, J. Beaulieu and J. Bousquet, 2015 Genetic adaptation to  
637 climate in white spruce involves small to moderate allele frequency shifts in  
638 functionally diverse genes. *Genome Biology and Evolution* 7: 3269-3285.
- 639 Huang, D. W., B. T. Sherman and R. A. Lempicki, 2009 Systematic and integrative analysis  
640 of large gene lists using DAVID bioinformatics resources. *Nature Protocols* 4: 44-57.
- 641 Kanehisa, M., and S. Goto, 2000 KEGG: kyoto encyclopedia of genes and genomes. *Nucleic*  
642 *Acids Research* 28: 27-30.
- 643 Lande, R., 1988 Genetics and demography in biological conservation. *Science* 241: 1455-  
644 1460.

- 645 Langella, O., 1999 POPULATIONS 1.2. 30 Population genetic software. CNRS  
646 UPR9034.[Online.] Available at [bioinformatics.org/~tryphon/populations](http://bioinformatics.org/~tryphon/populations).
- 647 Larson, W. A., L. W. Seeb, M. V. Everett, R. K. Waples, W. D. Templin *et al.*, 2014  
648 Genotyping by sequencing resolves shallow population structure to inform  
649 conservation of Chinook salmon (*Oncorhynchus tshawytscha*). *Evolutionary*  
650 *Applications* 7: 355-369.
- 651 Lembi, C. A., B. G. Ritenour, E. M. Iverson and E. C. Forss, 1978 The effects of vegetation  
652 removal by grass carp on water chemistry and phytoplankton in Indiana ponds.  
653 *Transactions of the American Fisheries Society* 107: 161-171.
- 654 Li, H., and R. Durbin, 2010 Fast and accurate long-read alignment with Burrows–Wheeler  
655 transform. *Bioinformatics* 26: 589-595.
- 656 Li, S., and F. Fang, 1990 Geographical distribution of the four kinds of pond-cultured carps.  
657 *Acta Zoologica Sinica* 36: 244-250.
- 658 Liu, F., J. H. Xia, Z. Y. Bai, J. J. Fu, J. L. Li *et al.*, 2009 High genetic diversity and  
659 substantial population differentiation in grass carp (*Ctenopharyngodon idella*)  
660 revealed by microsatellite analysis. *Aquaculture* 297: 51-56.
- 661 Liu, Z., and S. Li, 2015 *China Fisheries Yearbook 2014*. China Agriculture Press, Beijing,  
662 China.
- 663 McKay, J. K., and R. G. Latta, 2002 Adaptive population divergence: markers, QTL and  
664 traits. *Trends in Ecology & Evolution* 17: 285-291.
- 665 McKown, A. D., R. D. Guy, J. Klápště, A. Geraldès, M. Friedmann *et al.*, 2014 Geographical  
666 and environmental gradients shape phenotypic trait variation and genetic structure in  
667 *Populus trichocarpa*. *New Phytologist* 201: 1263-1276.
- 668 Merilä, J., and P. Crnokrak, 2001 Comparison of genetic differentiation at marker loci and  
669 quantitative traits. *Journal of Evolutionary Biology* 14: 892-903.

- 670 Mitchell, C., 1986 Effects of introduced grass carp on populations of two species of small  
671 native fishes in a small lake. *New Zealand Journal of Marine and Freshwater*  
672 *Research* 20: 219-230.
- 673 Mitchell, S. E., E. S. Rogers, T. J. Little and A. F. Read, 2005 Host-parasite and  
674 genotype-by-environment interactions: temperature modifies potential for selection by  
675 a sterilizing pathogen. *Evolution* 59: 70-80.
- 676 Moyle, P., 1986 Fish introductions into North America: patterns and ecological impact, pp.  
677 27-43 in *Ecology of biological invasions of North America and Hawaii*. Springer,  
678 New York.
- 679 Narum, S. R., C. A. Buerkle, J. W. Davey, M. R. Miller and P. A. Hohenlohe, 2013  
680 Genotyping-by-sequencing in ecological and conservation genomics. *Molecular*  
681 *Ecology* 22: 2841-2847.
- 682 Paetkau, D., R. Slade, M. Burden and A. Estoup, 2004 Genetic assignment methods for the  
683 direct, real-time estimation of migration rate: a simulation-based exploration of  
684 accuracy and power. *Molecular Ecology* 13: 55-65.
- 685 Pan, L., 1999 *The encyclopedia of the Chinese overseas*. Harvard University Press, USA.
- 686 Peter, R. E., H.-R. Lin and G. Van Der Kraak, 1988 Induced ovulation and spawning of  
687 cultured freshwater fish in China: advances in application of GnRH analogues and  
688 dopamine antagonists. *Aquaculture* 74: 1-10.
- 689 Peterson, B. K., J. N. Weber, E. H. Kay, H. S. Fisher and H. E. Hoekstra, 2012 Double digest  
690 RADseq: an inexpensive method for de novo SNP discovery and genotyping in model  
691 and non-model species. *PLoS ONE* 7: e37135.
- 692 Price, A. L., N. J. Patterson, R. M. Plenge, M. E. Weinblatt, N. A. Shadick *et al.*, 2006  
693 Principal components analysis corrects for stratification in genome-wide association  
694 studies. *Nature Genetics* 38: 904-909.

- 695 Raj, A., M. Stephens and J. K. Pritchard, 2014 fastSTRUCTURE: variational inference of  
696 population structure in large SNP data sets. *Genetics* 197: 573-589.
- 697 Raymond, M., and F. Rousset, 1995 GENEPOP (version 1.2): population genetics software  
698 for exact tests and ecumenicism. *Journal of Heredity* 86: 248-249.
- 699 Reynolds, J., B. S. Weir and C. C. Cockerham, 1983 Estimation of the coancestry coefficient:  
700 basis for a short-term genetic distance. *Genetics* 105: 767-779.
- 701 Savolainen, O., S. T. Kujala, C. Sokol, T. Pyhäjärvi, K. Avia *et al.*, 2011 Adaptive potential  
702 of northernmost tree populations to climate change, with emphasis on Scots pine  
703 (*Pinus sylvestris* L.). *Journal of Heredity* 102: 526-536.
- 704 Savolainen, O., M. Lascoux and J. Merilä, 2013 Ecological genomics of local adaptation.  
705 *Nature Reviews Genetics* 14: 807-820.
- 706 Seth, R. B., L. Sun, C. K. Ea and Z. J. Chen, 2005 Identification and characterization of  
707 MAVS, a mitochondrial antiviral signaling protein that activates NF- $\kappa$ B and IRF3.  
708 *Cell* 122: 669-682.
- 709 Sezgin, E., D. D. Duvernell, L. M. Matzkin, Y. Duan, C.-T. Zhu *et al.*, 2004 Single-locus  
710 latitudinal clines and their relationship to temperate adaptation in metabolic genes and  
711 derived alleles in *Drosophila melanogaster*. *Genetics* 168: 923-931.
- 712 Shireman, J. V., and C. R. Smith, 1983 *Synopsis of biological data on the grass carp,*  
713 *Ctenopharyngodon idella (Cuvier and Valenciennes, 1844)*. Food & Agriculture  
714 Organization. Rome, Italy.
- 715 Skelton, P. H., 2001 *A complete guide to the freshwater fishes of southern Africa*. Southern  
716 Book Publishers, Halfway House, South Africa.
- 717 Stanley, J. G., 1976 Production of hybrid, androgenetic, and gynogenetic grass carp and carp.  
718 *Transactions of the American Fisheries Society* 105: 10-16.

- 719 Storz, J. F., 2002 Contrasting patterns of divergence in quantitative traits and neutral DNA  
720 markers: analysis of clinal variation. *Molecular Ecology* 11: 2537-2551.
- 721 Sultan, S. E., and H. G. Spencer, 2002 Metapopulation structure favors plasticity over local  
722 adaptation. *The American Naturalist* 160: 271-283.
- 723 Vasemägi, A., 2006 The adaptive hypothesis of clinal variation revisited: single-locus clines  
724 as a result of spatially restricted gene flow. *Genetics* 173: 2411-2414.
- 725 Wang, L., S. Liu, Z. Zhuang, L. Guo, Z. Meng *et al.*, 2013 Population genetic studies  
726 revealed local adaptation in a high gene-flow marine fish, the small yellow croaker  
727 (*Larimichthys polyactis*). *PLoS ONE* 8: e83493.
- 728 Wang, L., Z. Y. Wan, H. S. Lim and G. H. Yue, 2015a Genetic heterogeneity and local  
729 adaptation of Asian seabass across Indonesian Archipelago revealed with gene-  
730 associated SNP markers. *Fisheries Research* 170: 205-211.
- 731 Wang, Y., Y. Lu, Y. Zhang, Z. Ning, Y. Li *et al.*, 2015b The draft genome of the grass carp  
732 (*Ctenopharyngodon idellus*) provides insights into its evolution and vegetarian  
733 adaptation. *Nature Genetics* 47: 625-631.
- 734 Ward, R., M. Woodwark and D. Skibinski, 1994 A comparison of genetic diversity levels in  
735 marine, freshwater, and anadromous fishes. *Journal of Fish Biology* 44: 213-232.
- 736 Weir, B. S., and C. C. Cockerham, 1984 Estimating F-statistics for the analysis of population  
737 structure. *Evolution* 38: 1358-1370.
- 738 Welcomme, R. L., 1988 *International introductions of inland aquatic species*. Food &  
739 Agriculture Organisation of the United Nations. Rome, Italy.
- 740 Ye, J., L. Fang, H. Zheng, Y. Zhang, J. Chen *et al.*, 2006 WEGO: a web tool for plotting GO  
741 annotations. *Nucleic Acids Research* 34: 293-297.

742 Zhang, S., H. Deng, D. Wang and L. Yu, 2001 Population structure and genetic diversity of  
743 silver carp and grass carp from populations of Yangtze river system revealed by  
744 RAPD. *Acta Hydrobiologica Sinica* 25: 330-336.

745 Zhu, D., 1993 *The Dictionary of River Systems in China*. Qingdao Press, Qingdao, China.

746

747

748

749

750

751

752

753

754

755

756

757

758

759

760



761 **Supporting information**

762 **Table S1** Summary statistics of annotated genes under putative directional selection and their  
763 potential functions in grass carp

764 **Table S2** Enriched KEGG pathways and the candidate genes under potential selection in  
765 grass carp

766

767

768 **Tables**

769 **Table 1** Sampling information of six native and three introduced grass carp populations  
770 including river systems of origin, numbers of samples, sampling localities and dates, and the  
771 annual average temperature of each sampling locality. Measures of genetic diversity  
772 including observed heterozygosity ( $H_O$ ), expected heterozygosity ( $H_E$ ) and nucleotide  
773 diversity ( $\Pi$ ) are also indicated.

| Samples  | Origin                    | N  | Longitude | Latitude | Date | Temperature | $H_O$ | $H_E$ | $\Pi$ |
|----------|---------------------------|----|-----------|----------|------|-------------|-------|-------|-------|
| Nenjiang | Heilongjiang River System | 22 | 125.22    | 49.21    | 2007 | 4.3         | 0.197 | 0.202 | 0.207 |
| Hanjiang | Yangtze River System      | 26 | 119.43    | 32.35    | 2007 | 15.4        | 0.200 | 0.201 | 0.205 |
| Jiujiang | Yangtze River System      | 23 | 115.96    | 29.72    | 2007 | 17.7        | 0.202 | 0.205 | 0.210 |
| Shishou  | Yangtze River System      | 11 | 112.39    | 29.74    | 2007 | 16.9        | 0.210 | 0.204 | 0.214 |
| Zhaoqing | Pearl River System        | 21 | 112.53    | 23.08    | 2007 | 22.7        | 0.203 | 0.201 | 0.206 |
| Vietnam  | Pearl River System        | 26 | 105.98    | 21.12    | 2008 | 24.8        | 0.190 | 0.191 | 0.195 |
| Malaysia | Introduced                | 18 | 101.15    | 4.58     | 2008 | Na.         | 0.136 | 0.126 | 0.130 |
| India    | Introduced                | 25 | 83.37     | 26.76    | 2008 | Na.         | 0.171 | 0.168 | 0.171 |
| Nepal    | Introduced                | 25 | 85.03     | 27.42    | 2008 | Na.         | 0.161 | 0.152 | 0.155 |

774

775

776 **Table 2** Pairwise  $F_{ST}$  values among each pair of populations of grass carp. Genetic  
777 differentiation that was non-significant after Bonferroni corrections ( $P < 0.001$ ) is denoted in  
778 bold.

|          | Nenjiang | Hanjiang | Jiujiang      | Shishou | Zhaoqing | Vietnam | India  | Nepal  | Malaysia |
|----------|----------|----------|---------------|---------|----------|---------|--------|--------|----------|
| Nenjiang | -        |          |               |         |          |         |        |        |          |
| Hanjiang | 0.0260   | -        |               |         |          |         |        |        |          |
| Jiujiang | 0.0228   | 0.0154   | -             |         |          |         |        |        |          |
| Shishou  | 0.0196   | 0.0123   | <b>0.0073</b> | -       |          |         |        |        |          |
| Zhaoqing | 0.0272   | 0.0351   | 0.0337        | 0.0279  | -        |         |        |        |          |
| Vietnam  | 0.0448   | 0.0515   | 0.0484        | 0.0449  | 0.0238   | -       |        |        |          |
| India    | 0.1265   | 0.1307   | 0.1282        | 0.1289  | 0.1126   | 0.1297  | -      |        |          |
| Nepal    | 0.1540   | 0.1580   | 0.1532        | 0.1596  | 0.1384   | 0.1592  | 0.1814 | -      |          |
| Malaysia | 0.2295   | 0.2255   | 0.2224        | 0.2336  | 0.2205   | 0.2399  | 0.3167 | 0.3501 | -        |

779

780

781

782

783

784

785

786

787

788

789

790 **Table 3** Enriched candidate genes under putative directional selection and their potential  
 791 functions in grass carp. Approaches, including  $F_{ST}$  outlier tests, Bayenv and allele frequency  
 792 correlations (AFC), that were used to determine if one gene was under putative selection, are  
 793 also indicated.

| Locus     | Gene name                                            | Function            | Approaches       |        |     |
|-----------|------------------------------------------------------|---------------------|------------------|--------|-----|
| Lca7796   | Toll-like receptor 5b                                | Immune response     | $F_{ST}$ outlier |        |     |
| Lca7927   | Chemokine (C-C motif)-like                           | Immune response     |                  |        | AFC |
| Lca15228  | DEXH (Asp-Glu-X-His) box polypeptide 58              | Antiviral signaling | $F_{ST}$ outlier |        |     |
| Lca33879  | Phosphofurin acidic cluster sorting protein 2        | Antiviral signaling |                  | Bayenv |     |
| Lca52319  | Myxovirus (influenza virus) resistance E             | Antiviral signaling | $F_{ST}$ outlier | Bayenv | AFC |
| Lca57825  | Integrin alpha FG-GAP repeat containing 1            | Antiviral signaling |                  | Bayenv | AFC |
| Lca79226  | Interleukin-1 receptor-associated kinase 1           | Immune response     | $F_{ST}$ outlier |        |     |
| Lca88973  | Major histocompatibility complex class I antigen UKA | Immune response     | $F_{ST}$ outlier | Bayenv | AFC |
| Lca110035 | Grass carp reovirus (GCRV)-induced gene 21           | Antiviral signaling | $F_{ST}$ outlier |        |     |
| Lca152085 | Interferon induced with helicase C domain 1          | Immune response     | $F_{ST}$ outlier |        |     |
| Lca152284 | PC4 and SFRS1 interacting protein 1                  | Antiviral signaling | $F_{ST}$ outlier |        | AFC |
| Lca159757 | Major histocompatibility complex class II DAB        | Immune response     | $F_{ST}$ outlier |        |     |
| Lca175136 | Lymphocyte cytosolic protein 1                       | Immune response     |                  |        | AFC |
| Lca183026 | Myxovirus (influenza) resistance A                   | Antiviral signaling | $F_{ST}$ outlier |        |     |
| Lca202544 | Baculoviral IAP repeat containing 2                  | Immune response     | $F_{ST}$ outlier |        |     |
| Lca285612 | Mitochondrial antiviral signalling protein           | Antiviral signaling |                  |        | AFC |

794

795

796

797

798

799

800 **Figures**

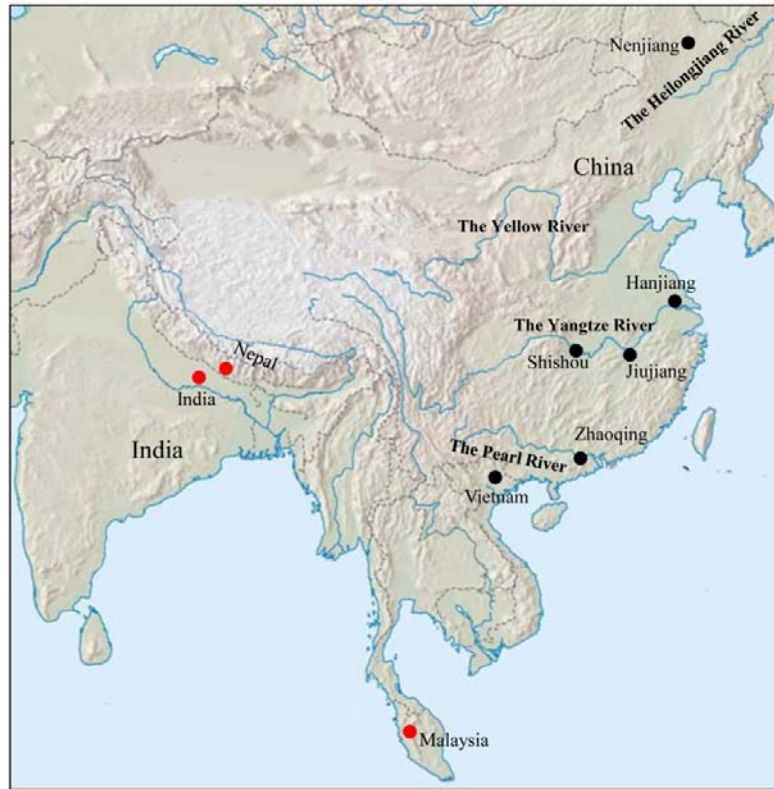

801

802 **Figure 1** Sampling sites of six native grass carp populations distributed in the three river  
803 systems: the Heilongjiang River, the Yangtze River and the Pearl River Systems, and three  
804 introduced populations from Malaysia, India and Nepal. The wild and introduced populations  
805 are denoted as black and red solid circles, respectively. Detailed sampling information is  
806 listed in Table 1.

807

808

809

810

811

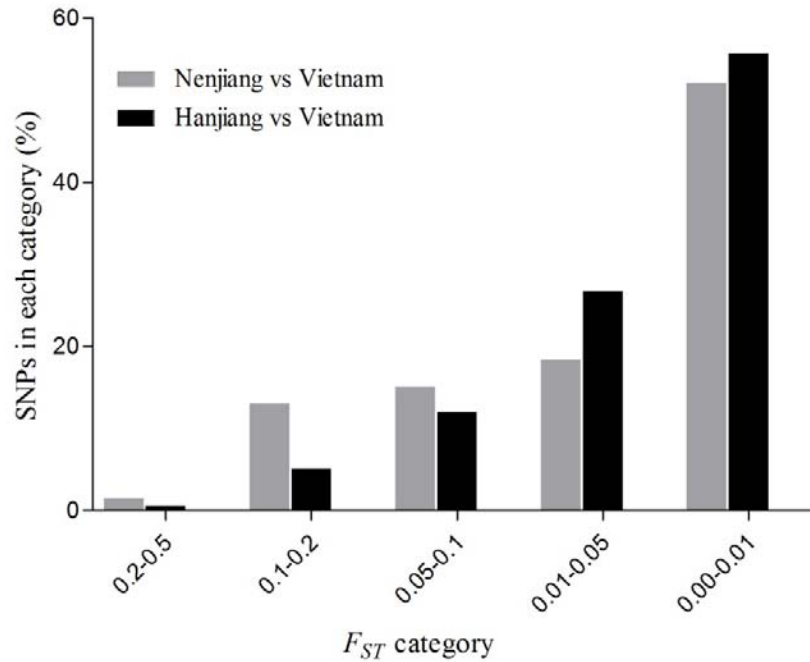

812

813 **Figure 2** Distribution of  $F_{ST}$  values in different categories between Nenjiang and Vietnam,  
814 with the longest geographical distance, and between Hanjiang and Vietnam, with the largest  
815 genetic distance, based on all genotyped SNPs with MAF > 0.05.

816

817

818

819

820

821

822

823

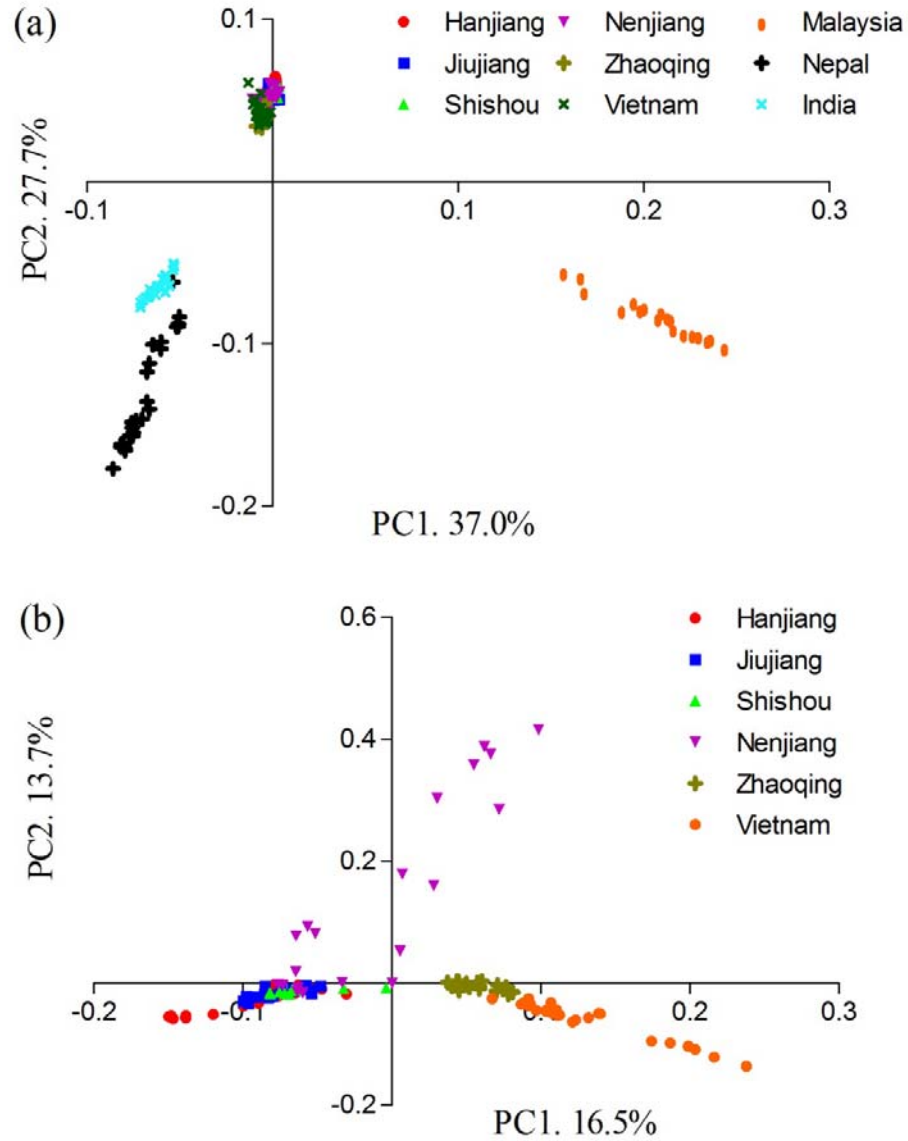

824

825

826 **Figure 3** Principal component analyses for (a) all nine populations and (b) six native  
827 populations of grass carp based on all genotyped SNPs.

828

829

830

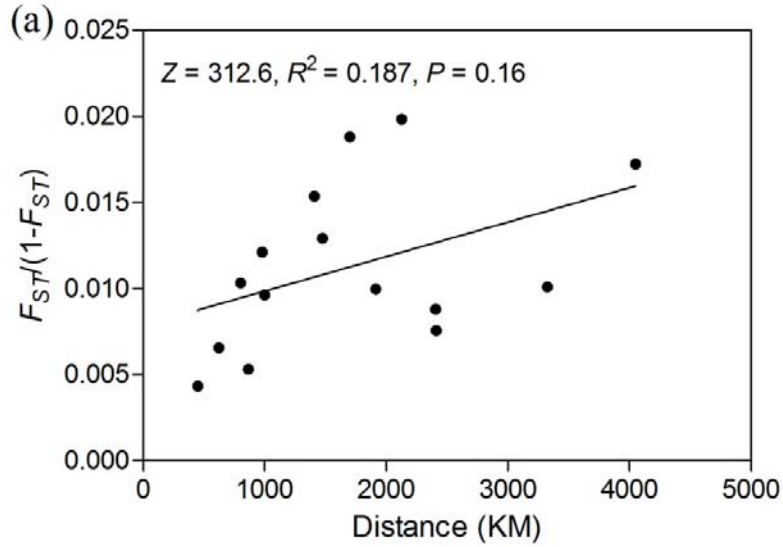

831

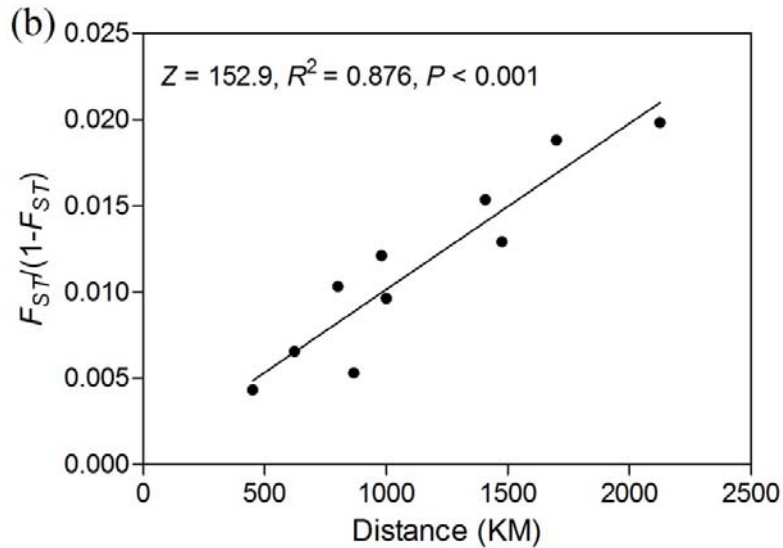

832

833 **Figure 4** The overall pattern of isolation-by-distance for (a) all six native populations and (b)  
834 five native populations excluding population Nenjiang, examined using Mantel tests based on  
835 all genotyped SNPs. Genetic distance was estimated as  $F_{ST}/(1-F_{ST})$ , while geographical  
836 distance was the linear distance between sampling localities.

837

838

839

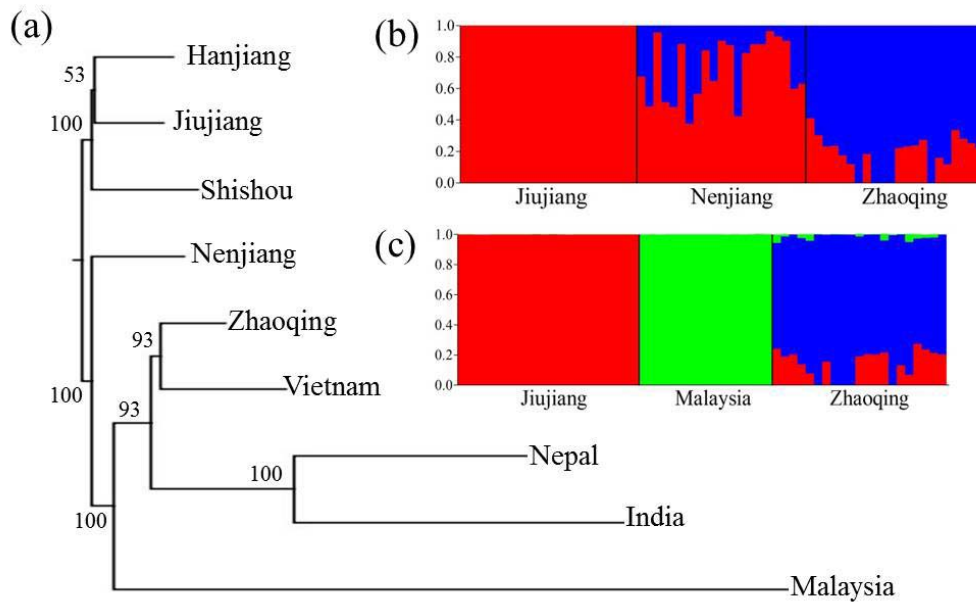

840

841 **Figure 5** (a) Phylogenetic relationships among all nine populations of grass carp constructed  
842 using the Neighbor-Joining approach. Bootstrap supports over loci for 1000 times are  
843 indicated. (b) Genetic assignment of the native population Nenjiang to the Yangtze River  
844 System and the Pearl River System and (c) genetic assignment of the introduced population  
845 Malaysia to the Yangtze River System and the Pearl River System, respectively. The most  
846 likely K value for both assignment tests in the program Structure was inferred as 5. Each  
847 vertical line represents one individual, while each colour shows the genetic composition that  
848 is assigned into a distinct genetic cluster.

849

850

851

852



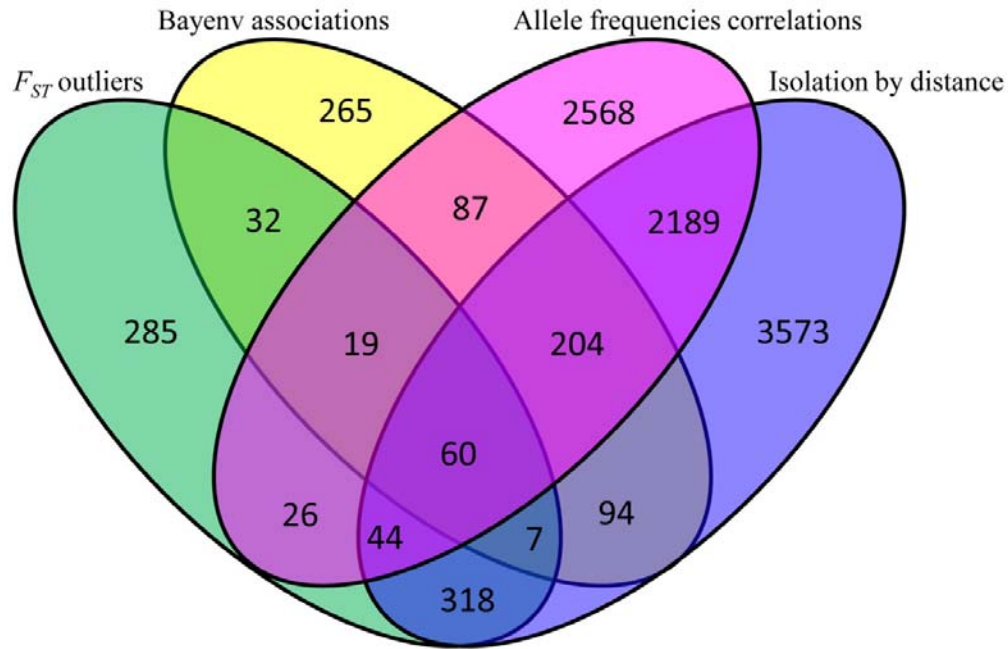

853

854 **Figure 6** Venn diagrams showing the number of loci under putative selection and isolation-  
855 by-distance as revealed by *F<sub>ST</sub>* outlier tests, Bayenv association tests, Allele frequency  
856 correlations and Mantels tests for Isolation-by-distance. The numbers of overlapping loci  
857 among the different approaches are also illustrated.

858

859

860

861

862

863

864

865

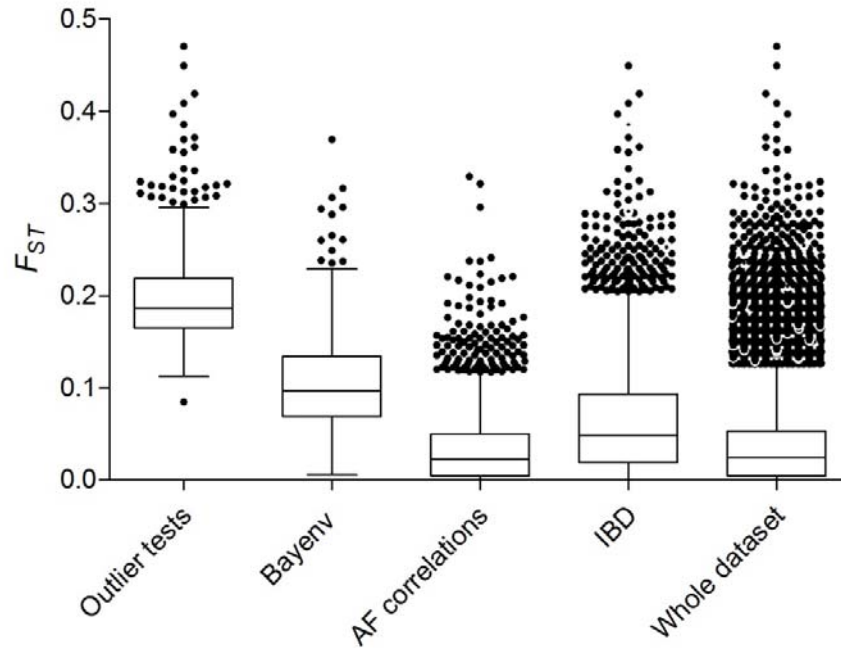

866

867 **Figure 7** Distribution of  $F_{ST}$  values for the SNPs that were identified as outliers for putative  
868 directional selection, associated with latitude as revealed by Bayenv, had allele frequencies  
869 correlated to latitude and agreed with the pattern of isolation-by-distance, as well as for the  
870 whole dataset. The highest and lowest error bar indicates the 95% quantile, while the median  
871 horizontal line denotes the mean  $F_{ST}$  value. Individual locus with  $F_{ST}$  over the upper 95%  
872 quantile is shown.

873

874

875

876

877

878

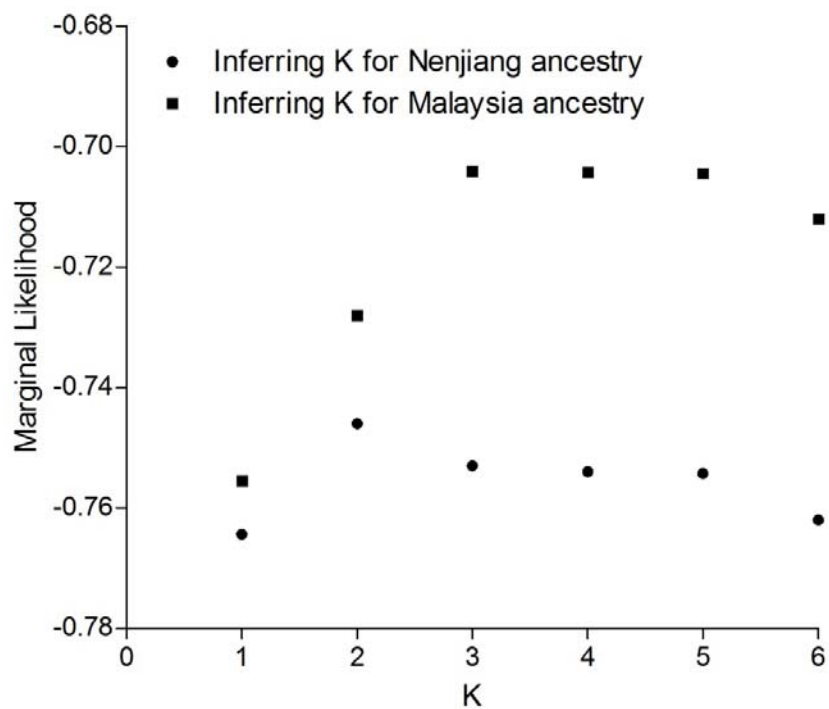

879

880 **Figure S1** Plotting of K values inferred from the program fastStructure.

881

882

883

884

885

886

887

888

889

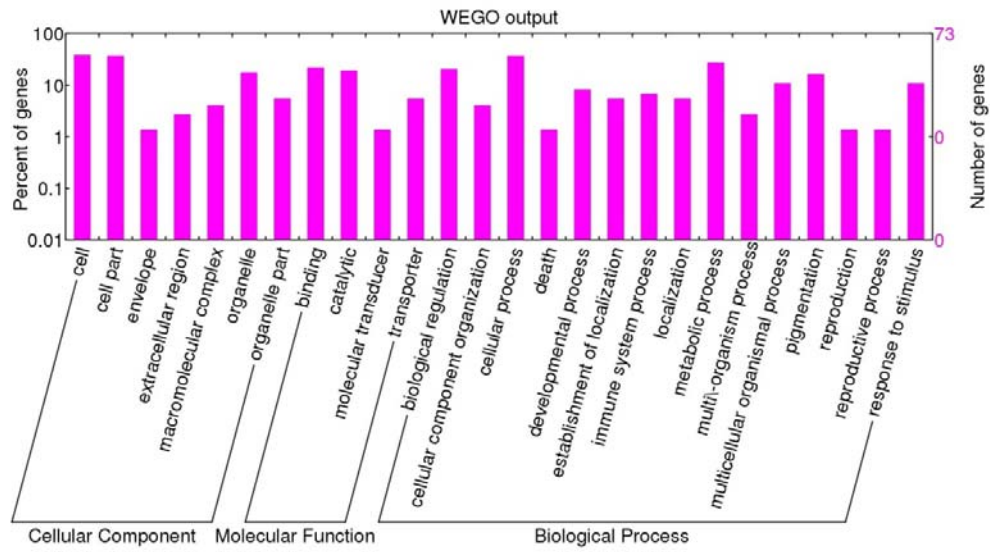

890

891 **Figure S2** Gene ontology annotations of the candidate genes under potential local selection

892 in grass carp. Three categories: Cellular Component, Molecular Function and Biological

893 Process, were used to visualize the potential functions of enriched genes

894
